# Supplementary material for: Time-resolved spectroscopic and electrophysiological data reveal insights in the gating mechanism of anion channelrhodopsin
Source: PubMed Central journal article supplement (PMC8121809; doi:10.1038/s42003-021-02101-5), 2021-05-14
Supplement: 42003_2021_2101_MOESM3_ESM.pdf [file 42003_2021_2101_MOESM3_ESM.pdf]

## Description of Additional Supplementary Files

**File name:** Supplemental Data 1

**Description:** The source data for the main figures is given in Supplementary Data 1.  
supplementary\_data\_fig2\_a.txt contains the source data for Figure 2a.  
supplementary\_data\_fig2\_cde.txt contains the source data for Figure 2c, 2d and 2e.  
supplementary\_data\_fig3.txt contains the source data for Figure 3.
